# Supplementary material
Source: Elsevier journal article supplement (https://www.sciencedirect.com/science/article/pii/S0001651920301473)

**Material suplementario.**

**Tabla 1.** Distribución del tipo de consumo de tabaco de los pacientes con carcinoma de orofaringe en función del estatus HPV.

|  | **HPV negativo** | **HPV positivo** | **P** |
| --- | --- | --- | --- |
| **No consumo** | 20 (6.2%) | 23 (38.3%) | 0.0001 |
| **≤ 20 cigarrillos/día** | 31 (9.5%) | 12 (20.0%) |
| **20 > cigarrillos/día** | 264 (81.2%) | 23 (38.3%) |
| **Cigarros** | 10 (3.1%) | 2 (3.3%) |
| **TOTAL** | 325 (100%) | 60 (100%) |

**Figura 1.** Supervivencia global de los pacientes incluidos en el estudio en función del tipo de consumo de tabaco.


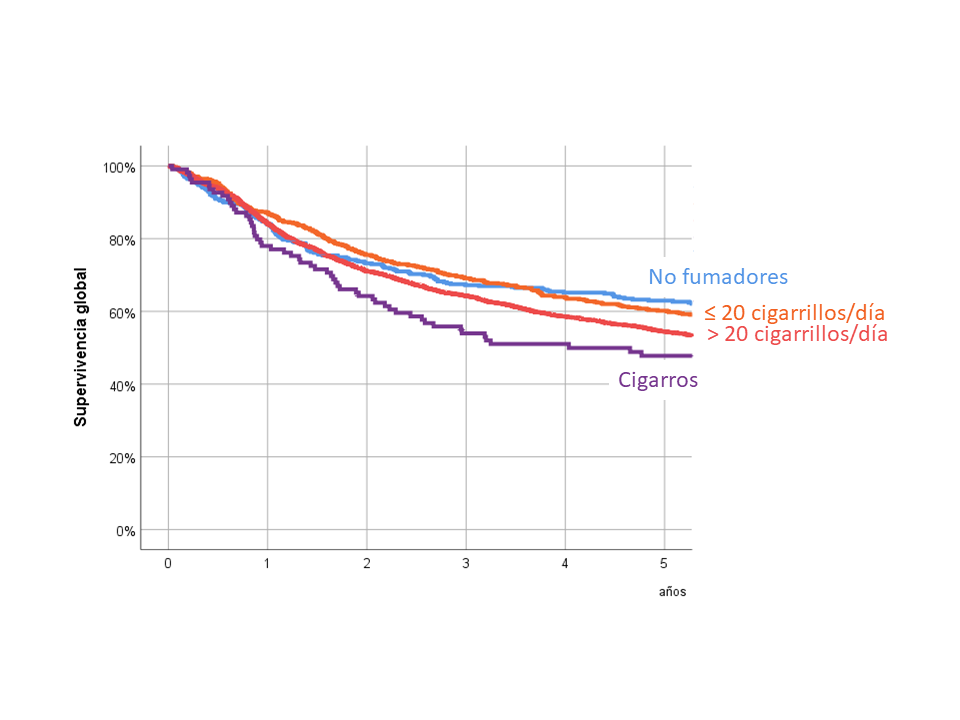


**Figura 2.** Consumos de cajetillas de cigarrillos y de cigarros en el estado español durante el periodo de acuerdo con datos del Ministerio de Hacienda13.


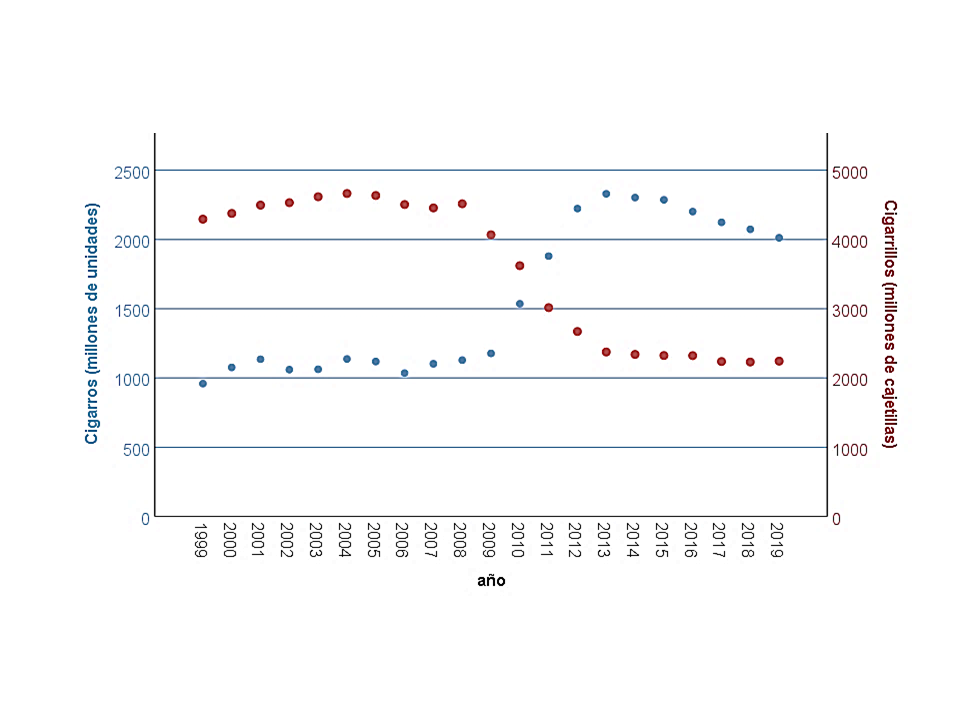

Supplement: mmc1 [file S0001651920301473:mmc1.doc]
